# Supplementary material for: Recent Advances in IR and UV/VIS Spectroscopic Characterization of the C76 and C84 Isomers of D2 Symmetry
Source: Hindawi journal article supplement (doi:10.1155/2014/701312), 2014-01-01
Supplement: f1 [file 701312.f1.zip]

Archive with 8 entries (7 files):
- mat.701312.v2/
- mat.701312.v2/Recent advances in IR and UVVIand C84 isomers of D2 symmetry 43.pdf
- mat.701312.v2/Recent advances in IR and UVVIand C84 isomers of D2 symmetry 44.pdf
- mat.701312.v2/Recent advances in IR and UVVIand C84 isomers of D2 symmetry 45.pdf
- mat.701312.v2/Recent advances in IR and UVVIand C84 isomers of D2 symmetry 46.pdf
- mat.701312.v2/Recent advances in IR and UVVIand C84 isomers of D2 symmetry 47.pdf
- mat.701312.v2/Recent advances in IR and UVVIand C84 isomers of D2 symmetry 48.pdf
- mat.701312.v2/Recent advances in IR and UVVIand C84 isomers of D2 symmetry 49.pdf
