# Supplementary material for: Recent Advances in IR and UV/VIS Spectroscopic Characterization of the C76 and C84 Isomers of D2 Symmetry
Source: Hindawi journal article supplement (doi:10.1155/2014/701312), 2014-01-01
Supplement: f1 [file 701312.f1.zip › mat.701312.v2/Recent advances in IR and UVVIand C84 isomers of D2 symmetry 43.pdf]

## **Additional, supplementary material**

### **Additional Figures**

The IR spectra of the three chromatographically purified  $C_{76}-D_2$  samples and of the three chromatographically purified  $C_{84}-D_2:22$  samples from this research.

Figures 1, 2, 3 and 4 are included and presented in the article.

Figures 1-2, 1-3, 2-2 and 2-3 are additional, supplementary material for the explanation of absorption bands in Tables 1 and 2.

Figure 1 presented in the article is equivalent with Figure 1-1.

Figure 2 presented in the article is equivalent with Figure 2-1.
