# Supplementary figures and images for: Recent Advances in IR and UV/VIS Spectroscopic Characterization of the C76 and C84 Isomers of D2 Symmetry
Source: Hindawi journal article supplement (doi:10.1155/2014/701312), 2014-01-01

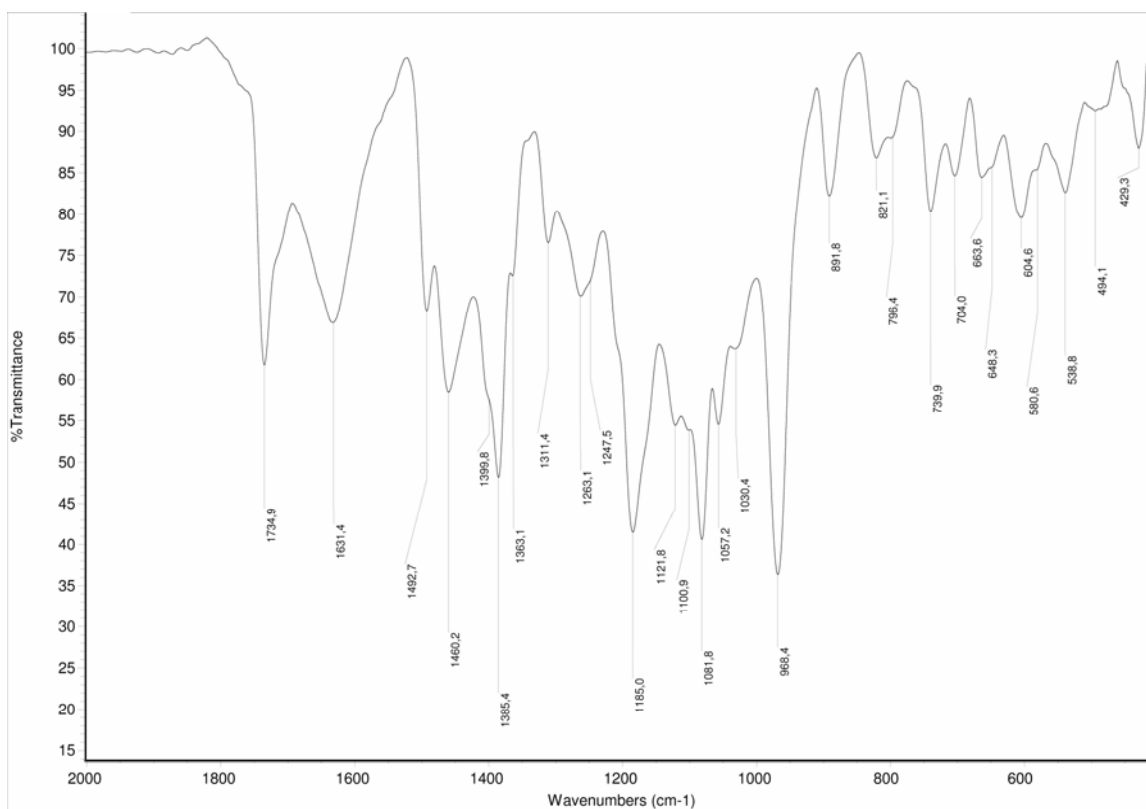

Figure 1-3.

Supplement: f1 [file 701312.f1.zip]

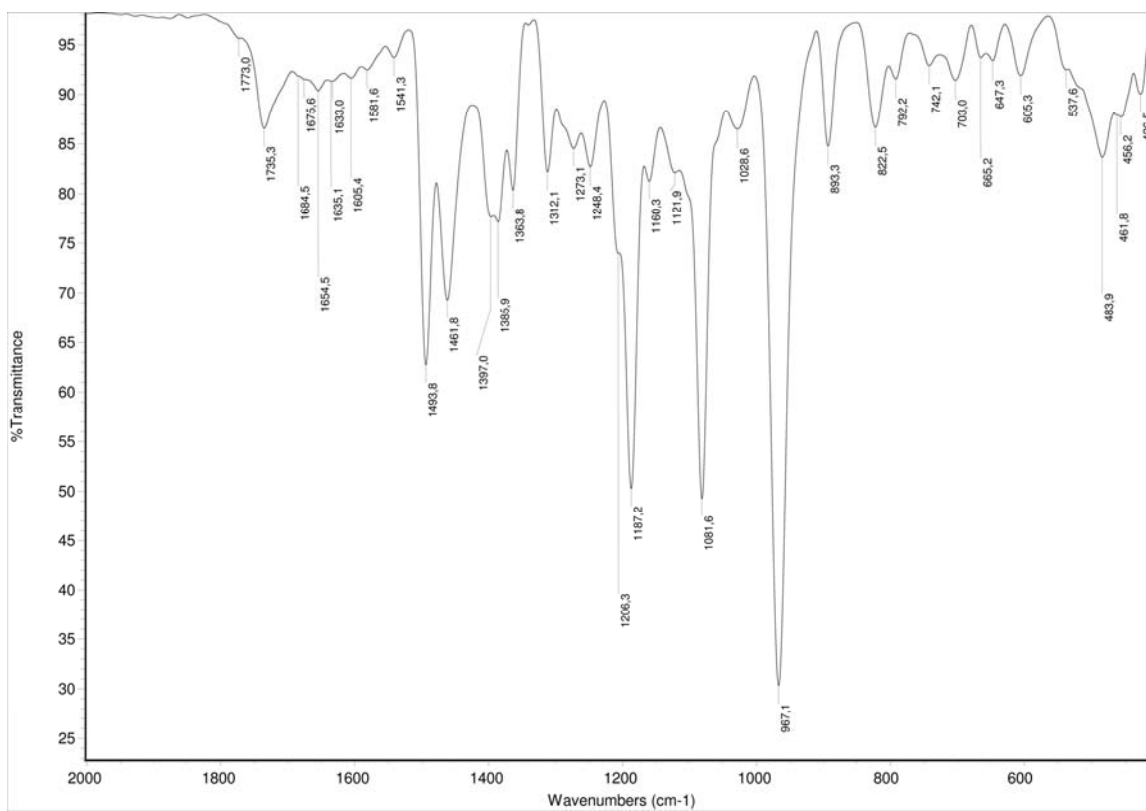

Figure 1-2.

Supplement: f1 [file 701312.f1.zip]

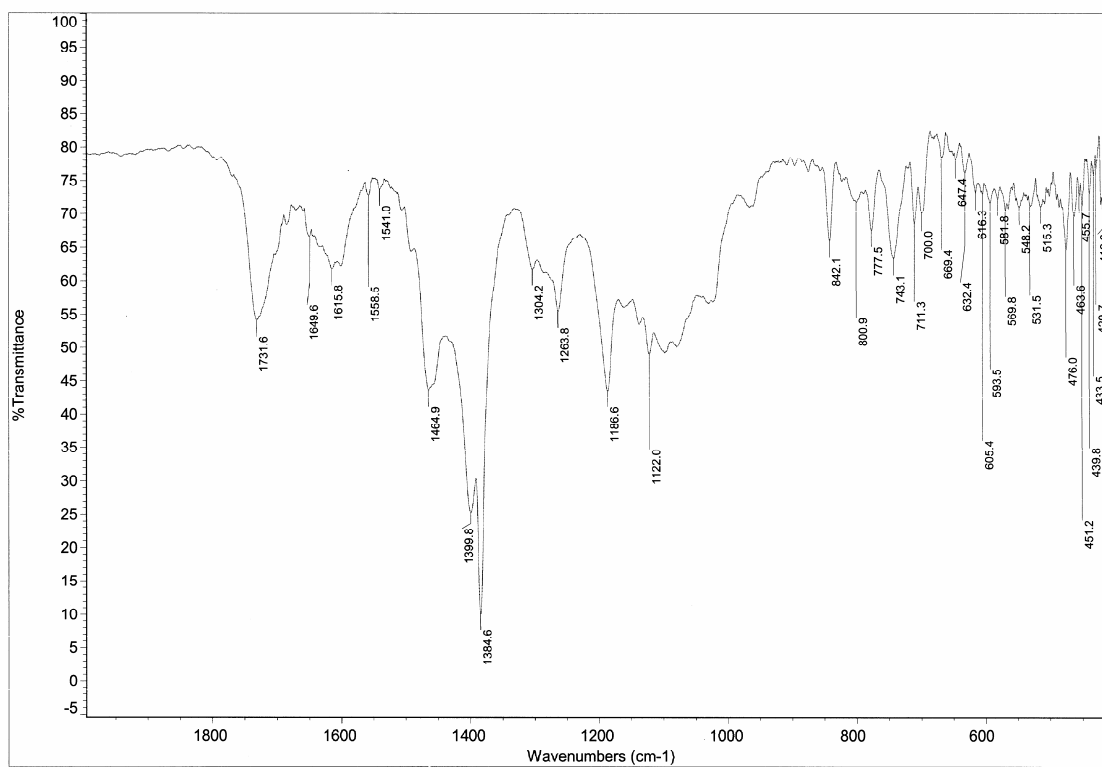

Figure 2-2.

Supplement: f1 [file 701312.f1.zip]

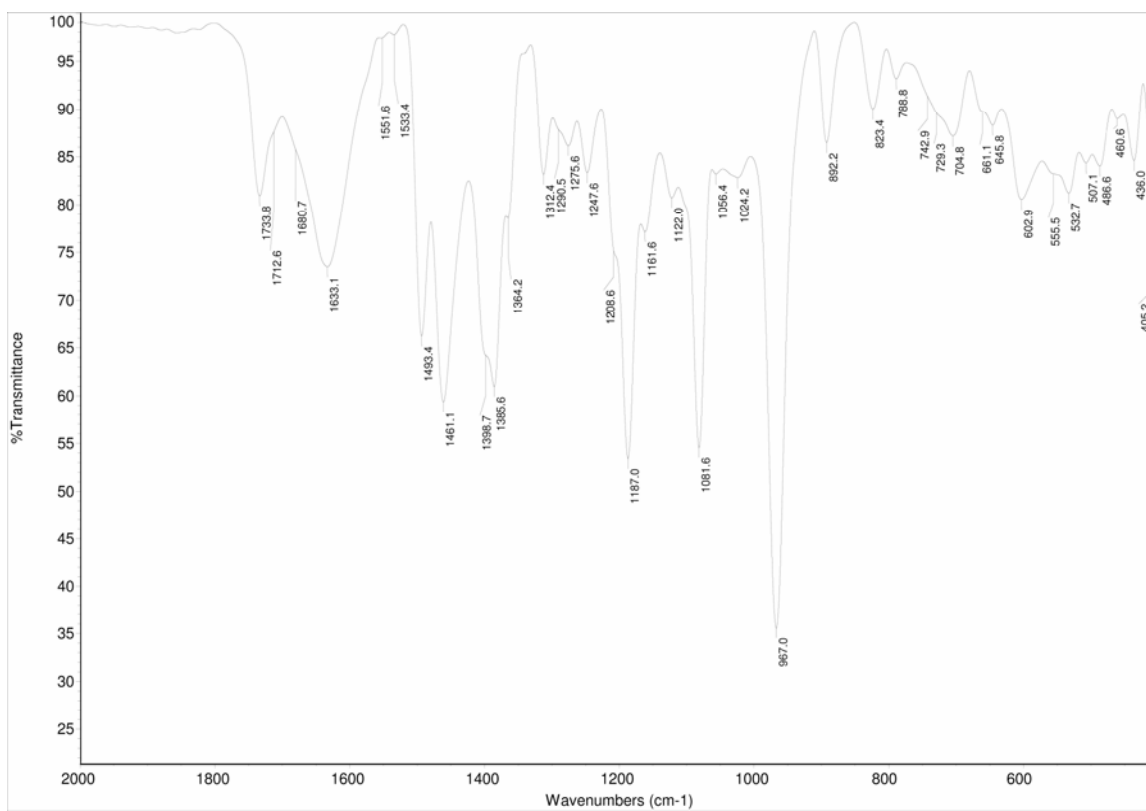

Figure 1-1.

Supplement: f1 [file 701312.f1.zip › mat.701312.v2/Recent advances in IR and UVVIand C84 isomers of D2 symmetry 44.pdf]

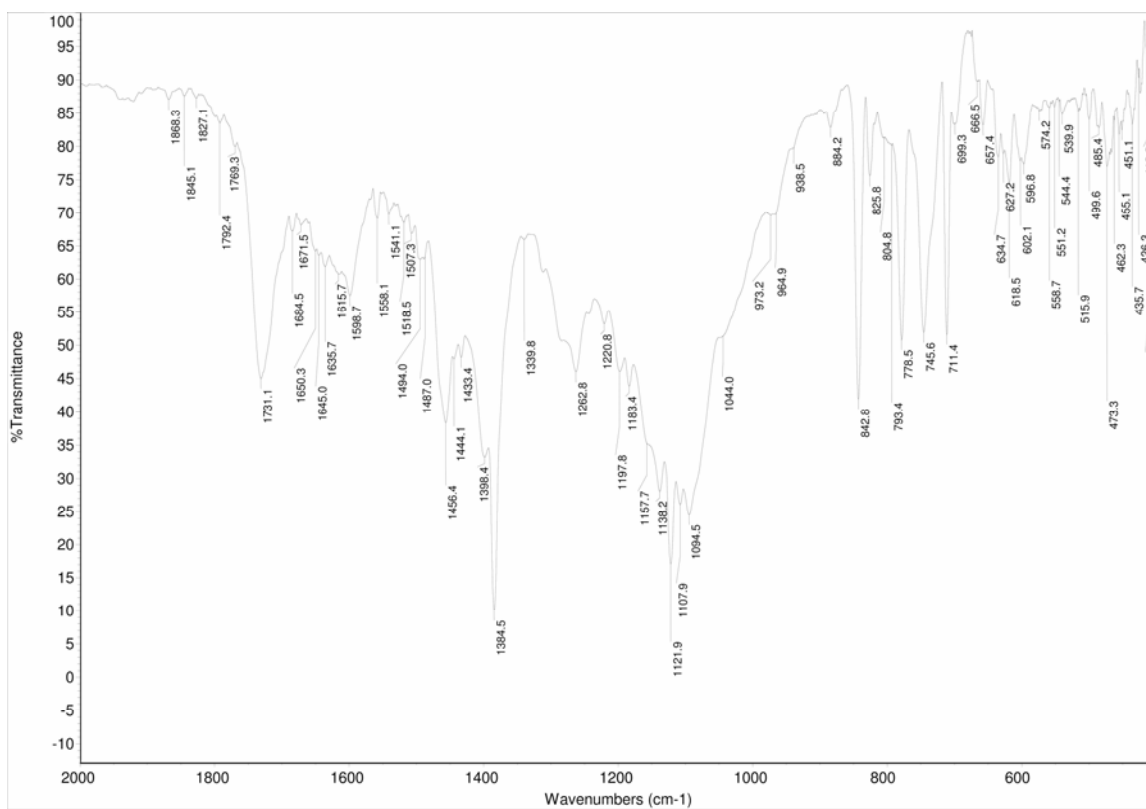

Figure 2-1.

Supplement: f1 [file 701312.f1.zip › mat.701312.v2/Recent advances in IR and UVVIand C84 isomers of D2 symmetry 47.pdf]

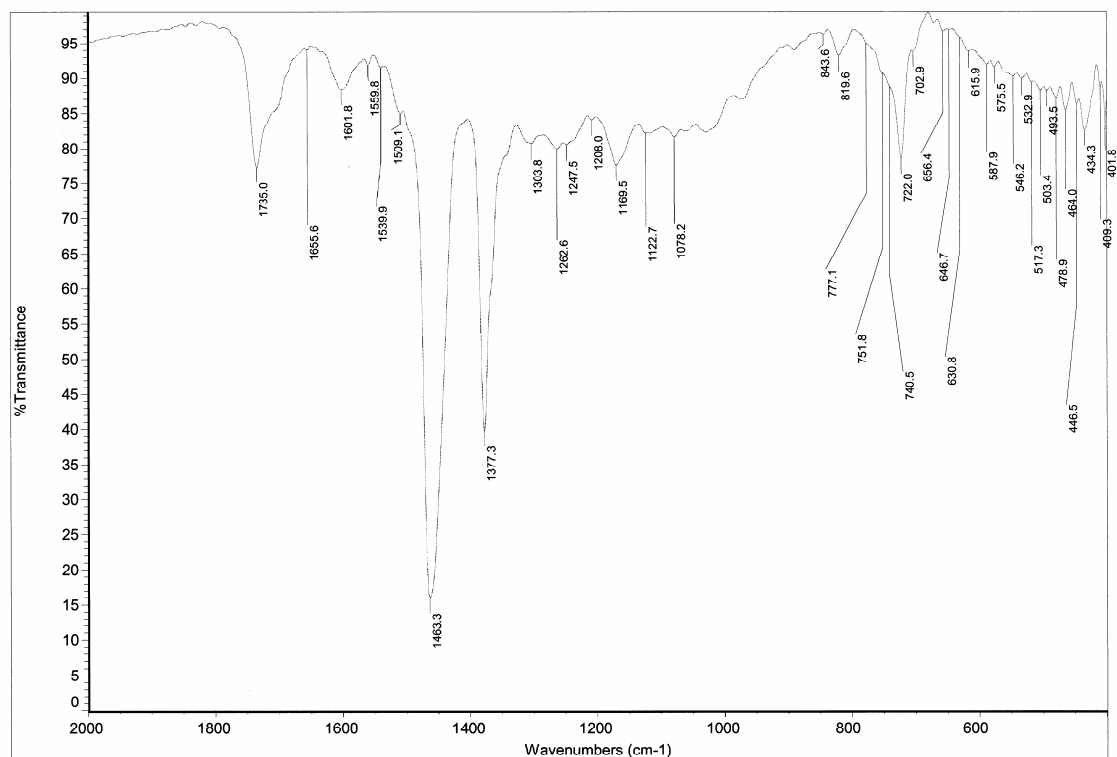

Figure 2-3.

Supplement: f1 [file 701312.f1.zip › mat.701312.v2/Recent advances in IR and UVVIand C84 isomers of D2 symmetry 49.pdf]
